# Supplementary material for: TGFβ1-induced SMAD2/3 and SMAD1/5 phosphorylation are both ALK5-kinase-dependent in primary chondrocytes and mediated by TAK1 kinase activity
Source: PubMed Central journal article supplement (PMC5452635; doi:10.1186/s13075-017-1302-4), 2017-05-31

# Figure S1

ALK expression in bovine chondrocytes and cartilage

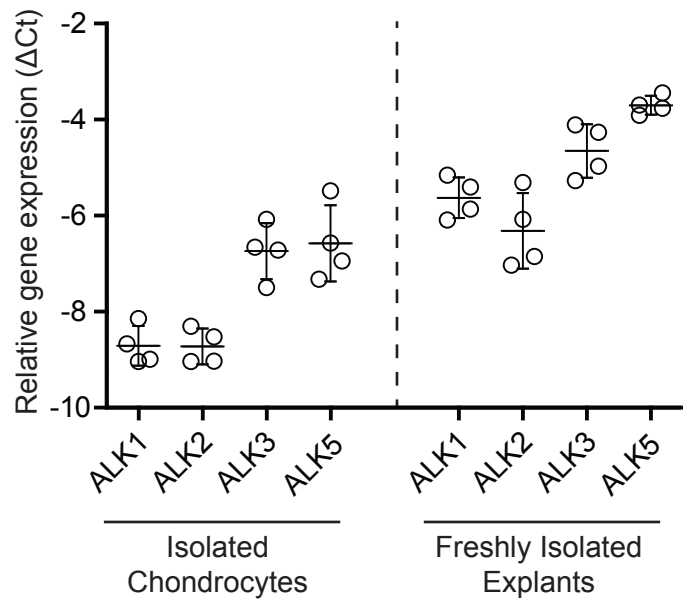

Supplement: 13075_2017_1302_MOESM1_ESM.pdf [file 13075_2017_1302_MOESM1_ESM.pdf]
