# Supplementary material for: TGFβ1-induced SMAD2/3 and SMAD1/5 phosphorylation are both ALK5-kinase-dependent in primary chondrocytes and mediated by TAK1 kinase activity
Source: PubMed Central journal article supplement (PMC5452635; doi:10.1186/s13075-017-1302-4), 2017-05-31

**Figure S3**

**TGF $\beta$ -induced pSmad2 in explants**

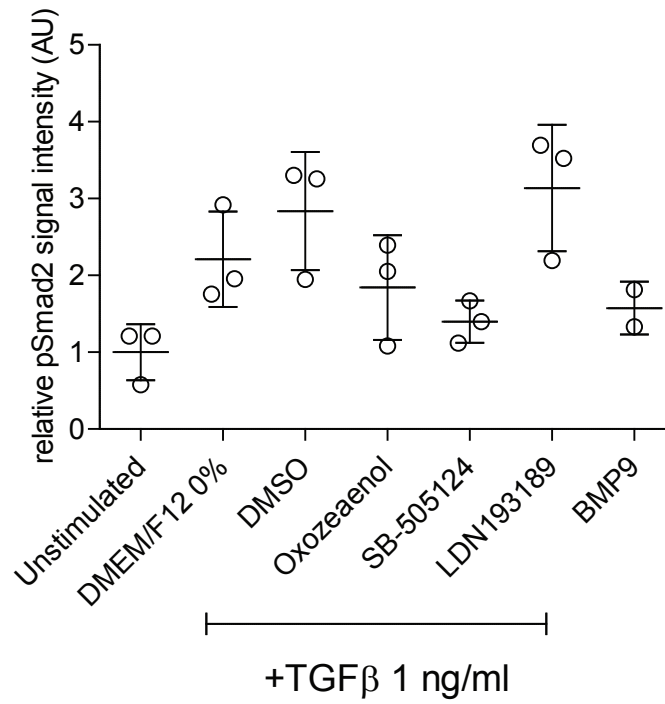

**TGF $\beta$ -induced pSmad1/5 in explants**

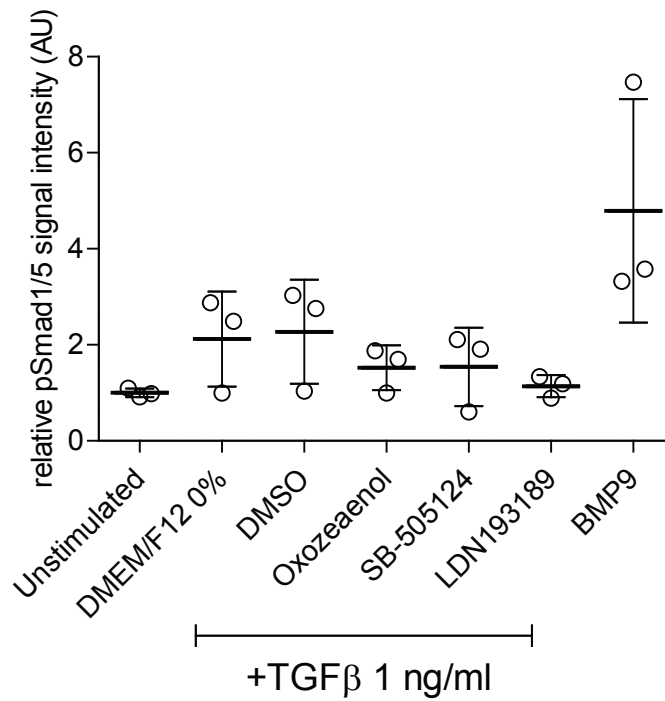

Supplement: 13075_2017_1302_MOESM2_ESM.pdf [file 13075_2017_1302_MOESM2_ESM.pdf]
