# Supplementary material for: TGFβ1-induced SMAD2/3 and SMAD1/5 phosphorylation are both ALK5-kinase-dependent in primary chondrocytes and mediated by TAK1 kinase activity
Source: Springer Nature journal article supplement (doi:10.1186/s13075-017-1302-4), 2017-05-31

# Figure S2

## ID1 expression in cartilage explants

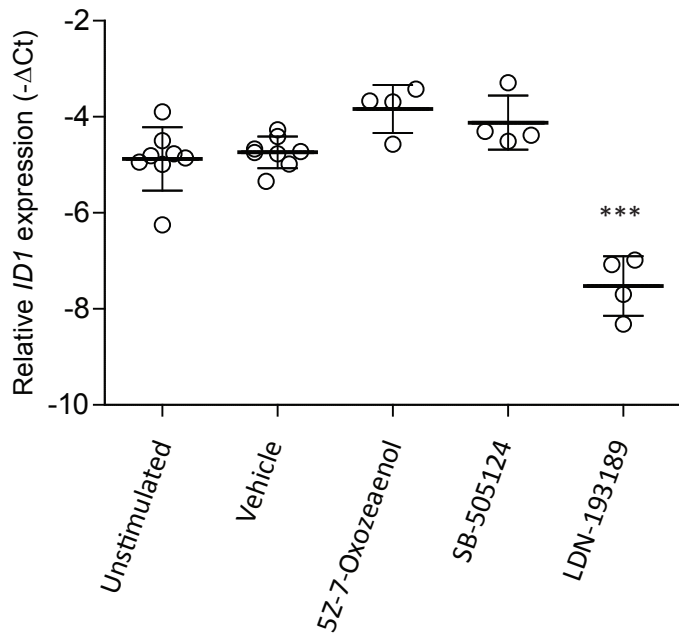

Supplement: MOESM3 [file 12329932]
